# Supplementary material for: Non-coding RNA derived from a conservative subtelomeric tandem repeat in chicken and Japanese quail somatic cells
Source: PubMed Central journal article supplement (PMC4301066; doi:10.1186/s13039-014-0102-7), 2014-12-23
Supplement: 13039_2014_102_MOESM2_ESM.pdf [file 13039_2014_102_MOESM2_ESM.pdf]

## Additional file 2

for the article “Non-coding RNA derived from a conservative subtelomeric tandem repeat in chicken and Japanese quail somatic cells”, Molecular Cytogenetics, Irina Trofimova, Darya Popova, Elena Vasilevskaya, Alla Krasikova\*, Saint-Petersburg State University, [alla.krasikova@gmail.com](mailto:alla.krasikova@gmail.com)

**Table S1.** Results of fluorescent *in situ* hybridization with PO41pos and PO41neg probes before or after treatment of MDCC-MSB1 interphase cells with different RNases.

| Probe          | Without RNases treatment                                                           | RNase A                   | RNase III                                                            | RNase H                                                                    | RNase H*                  |
|----------------|------------------------------------------------------------------------------------|---------------------------|----------------------------------------------------------------------|----------------------------------------------------------------------------|---------------------------|
| <b>PO41pos</b> | One or two bright foci in the nucleus or signals dispersed in interchromatin space | No signals in the nucleus | One weak focus in the nucleus. No dispersed signals in the nucleus   | One or multiple foci in the nucleus. No dispersed signals in the nucleus   | No signals in the nucleus |
| <b>PO41neg</b> | One or two bright foci in the nucleus or signals dispersed in interchromatin space | No signals in the nucleus | One to three small compact foci. No dispersed signals in the nucleus | One or two bright foci in the nucleus. No dispersed signals in the nucleus | No signals in the nucleus |

\* In case RNase H treatment performed after RNA-FISH.

**Table S2.** Results of fluorescent *in situ* hybridization with PO41pos and PO41neg probes after treatment of dividing MDCC-MSB1 cells with different RNases.

| <b>PO41pos probe, C-rich transcripts</b> |                                            |                                                                  |                    |                  |
|------------------------------------------|--------------------------------------------|------------------------------------------------------------------|--------------------|------------------|
| <b>RNase</b>                             | <b>Prophase</b>                            | <b>Metaphase</b>                                                 | <b>Anaphase</b>    | <b>Telophase</b> |
| <b>RiboShredder<br/>RNase blend</b>      | Without signals                            | Without signals                                                  | Without signals    | Without signals  |
| <b>RNase A</b>                           | Without signals                            | Without signals                                                  | Without signals    | Without signals  |
| <b>RNase H*</b>                          | Without signals                            | Without signals                                                  | Without signals    | Without signals  |
| <b>RNase H</b>                           | Without signals<br>or with week<br>signals | Predominantly without<br>signals, rarely with one<br>week signal | Without<br>signals | Without signals  |
| <b>RNase III</b>                         | Two signals                                | Predominantly without<br>signals, rarely with one<br>week signal | Without<br>signals | Without signals  |
| <b>PO41neg probe, G-rich transcripts</b> |                                            |                                                                  |                    |                  |
| <b>RNase</b>                             | <b>Prophase</b>                            | <b>Metaphase</b>                                                 | <b>Anaphase</b>    | <b>Telophase</b> |
| <b>RiboShredder<br/>RNase blend</b>      | Without signals                            | Without signals                                                  | Without<br>signals | Without signals  |
| <b>RNase A</b>                           | Without signals                            | Without signals                                                  | Without<br>signals | Without signals  |
| <b>RNase H*</b>                          | Without signals                            | Without signals                                                  | Without<br>signals | Without signals  |
| <b>RNase H</b>                           | Without signals                            | Predominantly without<br>signals, rarely with one<br>week signal | Without<br>signals | Without signals  |
| <b>RNase III</b>                         | Without signals                            | Predominantly without<br>signals, rarely with one<br>signal      | Without<br>signals | Without signals  |

\* In case RNase H treatment performed after RNA-FISH.

**Table S3.** Results of fluorescent *in situ* hybridization with PO41pos and PO41neg probes on cryosections of chicken somatic tissues.

| Tissue                 | PO41pos probe                                  |                                            |                          | PO41neg probe                                                     |                                            |                                                                   |
|------------------------|------------------------------------------------|--------------------------------------------|--------------------------|-------------------------------------------------------------------|--------------------------------------------|-------------------------------------------------------------------|
|                        | RNA FISH                                       | DNA FISH                                   | RNase A + RNA FISH       | RNA FISH                                                          | DNA FISH                                   | RNase A + RNA FISH                                                |
| <b>Muscles</b>         | One to three foci in nuclei of all cell layers | Multiple foci in nuclei of all cell layers | No signals in the nuclei | One to three foci in nuclei of all cell layers                    | Multiple foci in nuclei of all cell layers | No signals in the nuclei                                          |
| <b>Oviduct</b>         | One or two foci in nuclei of all cell layers   | Multiple foci in nuclei of all cell layers | No signals in the nuclei | One or two foci in nuclei of all cell layers                      | Multiple foci in nuclei of all cell layers | No signals in the nuclei                                          |
| <b>Cerebellum</b>      | One or two foci in nuclei of all cell layers   | Multiple foci in nuclei of all cell layers | No signals in the nuclei | One or two foci in nuclei of all cell layers                      | Multiple foci in nuclei of all cell layers | RNase A-stable foci, especially in large nuclei of Purkinje cells |
| <b>Telencephalon</b>   | One foci in nuclei of all cell layers          | Multiple foci in nuclei of all cell layers | No signals in the nuclei | One foci in nuclei of all cell layers                             | Multiple foci in nuclei of all cell layers | RNase A-stable foci in nuclei of all cell layers                  |
| <b>Small intestine</b> | One or two foci in nuclei of mucous membrane   | Multiple foci in nuclei of all cell layers | No signals in the nuclei | No signals in the nuclei. Cytoplasmic granules in mucous membrane | Multiple foci in nuclei of all cell layers | Cytoplasmic granules in mucous membrane                           |
| <b>Large intestine</b> | One foci in nuclei of mucous membrane          | Multiple foci in nuclei of all cell layers | No signals in the nuclei | No signals in the nuclei. Cytoplasmic granules in mucous membrane | Multiple foci in nuclei of all cell layers | Cytoplasmic granules in mucous membrane                           |
